# Supplementary material for: Fabrication of PES Modified by TiO2/Na2Ti3O7 Nanocomposite Mixed-Matrix Woven Membrane for Enhanced Performance of Forward Osmosis: Influence of Membrane Orientation and Feed Solutions
Source: MDPI journal article supplement (doi:10.3390/membranes13070654), 2023-07-08
Supplement: s1 [file s1]

**Fabrication of PES modified by  $\text{TiO}_2/\text{Na}_2\text{Ti}_3\text{O}_7$  nanocomposite mixed matrix woven membrane for enhancement performance of forward osmosis: Influence of membrane orientation and feed solutions**

**Ghadah M. Al-Senani<sup>1</sup>, Mervat Nasr<sup>2,3</sup>, Mohamed Zayed<sup>2</sup>, Sahar S. Ali<sup>4</sup>, Hind Alshaikh<sup>5</sup>, Hanafy M. Abd El-Salam<sup>3</sup> and Mohamed Shaban<sup>2, 6\*</sup>**

<sup>1</sup> Department of Chemistry, College of Science, Princess Nourah bint Abdulrahman University, P.O. Box 84428, Riyadh 11671, Saudi Arabia; gmalsnany@pnu.edu.sa

<sup>2</sup> Nanophotonics and Applications (NPA) Lab, Physics Department, Faculty of Science, Beni-Suef University, Beni-Suef, 62514, Egypt; m.zayed88ph@yahoo.com (M.Z.); mervat.nasr@science.bsu.edu.eg (M.N.); mssfadel@aucegypt.edu (M.S.)

<sup>3</sup> Chemistry Department, Faculty of Science, Beni-Suef University, Beni-Suef 62514, Egypt

<sup>4</sup> Chemical Engineering and Pilot-Plant Department, National Research Center, Dokki, Cairo, 12622, Egypt; sahar\_saad\_ali@yahoo.com (S.S.A.)

<sup>5</sup> Chemistry Department, Science and Arts College, Rabigh Campus, King Abdulaziz University, P.O. Box 344, Jeddah 21911, Saudi Arabia; hfalshakh@kau.edu.sa

<sup>6</sup> Department of Physics, Faculty of Science, Islamic University of Madinah, P. O. Box 170, Madinah 42351, Saudi Arabia; mssfadel@aucegypt.edu (M.S.)

\* Corresponding author: mssfadel@aucegypt.edu

**Table S1. Characteristic of used woven fabric .**

| Fabric type | Fiber diameter ( $\mu\text{m}$ ) | Thickness ( $\mu\text{m}$ ) | Permeability ( $\text{L}/\text{m}^2\text{h.bar}$ ) | Tensile strength ( $\text{N}/\text{cm}^2$ ) | Elongation (%) | Contact angle ( $^\circ$ ) |
|-------------|----------------------------------|-----------------------------|----------------------------------------------------|---------------------------------------------|----------------|----------------------------|
| Cetin Woven | 11.6                             | 115                         | 1254                                               | 31.2                                        | 44.2           | 41                         |
